# Supplementary material for: Chitin protects the gut epithelial barrier in a protochordate model of DSS-induced colitis
Source: PubMed Central journal article supplement (PMC5827265; doi:10.1242/bio.029355), 2017-12-08
Supplement: biolopen-7-029355-s1.pdf [file biolopen-7-029355-s1.pdf]

| Acronym      | Gene name                                           | GeneBank acc. no | Oligonucleotide (5'-3')                          | Amplicon (bp). | Slope | $R^2$ | $E$  |
|--------------|-----------------------------------------------------|------------------|--------------------------------------------------|----------------|-------|-------|------|
| Ci-TLR1      | Toll-like receptor1                                 | AB495261         | F cgtagccaatagctggacaa<br>R agtcgttcaacaccaaccaa | 135            | -3.08 | 0.982 | 100% |
| Ci-TLR2      | Toll-like receptor2                                 | AB495262         | F aatgtgcattcacgagcgtg<br>R acgtcgagatgtgctgatgc | 82             | -2.17 | 0.935 | 100% |
| IL-17-1      | Interleukin 17-1                                    | NM_001129875     | F acatgtccagcagacgagga<br>R caaccaacggtaatggttg  | 127            | -3.49 | 0.989 | 94%  |
| IL-17-2      | Interleukin 17-2                                    | NM_001129874     | F cgggtgcattgcttctagt<br>R cagcaggtacagcctattg   | 145            | -3.45 | 0.996 | 95%  |
| TNF $\alpha$ | tumor necrosis factor alpha                         | NM_001128107     | F caaatggaccgccattaaa<br>R cctgttccgtgtccaaga    | 64             | -3.33 | 0.975 | 100% |
| C3-1         | complement component c3                             | NM_001032512     | F agcgaagatccattgtac<br>R gcaattcctggtccacagt    | 174            | -3.36 | 0.997 | 99%  |
| VCBP-A       | Variable region-containing chitin-binding protein A | HQ324141         | F attgatacagtgcagtg<br>R cggtagtgggaatatgaa      | 188            | -2.84 | 0.979 | 100% |
| VCBP-C       | Variable region-containing chitin-binding protein C | HQ324151         | F agaccaacccaacacagta<br>R cccatacattgcagcatttc  | 144            | -3.16 | 0.996 | 100% |
| act          | cytoskeletal actin                                  | AJ297725         | F cccaatcatgttcgaaacc<br>R acaccatcaccactgtcgaa  | 118            | -3.41 | 0.992 | 97%  |

**Table S1. Primer sequences and efficiency of *Ciona* genes analyzed in qPCR experiments.**

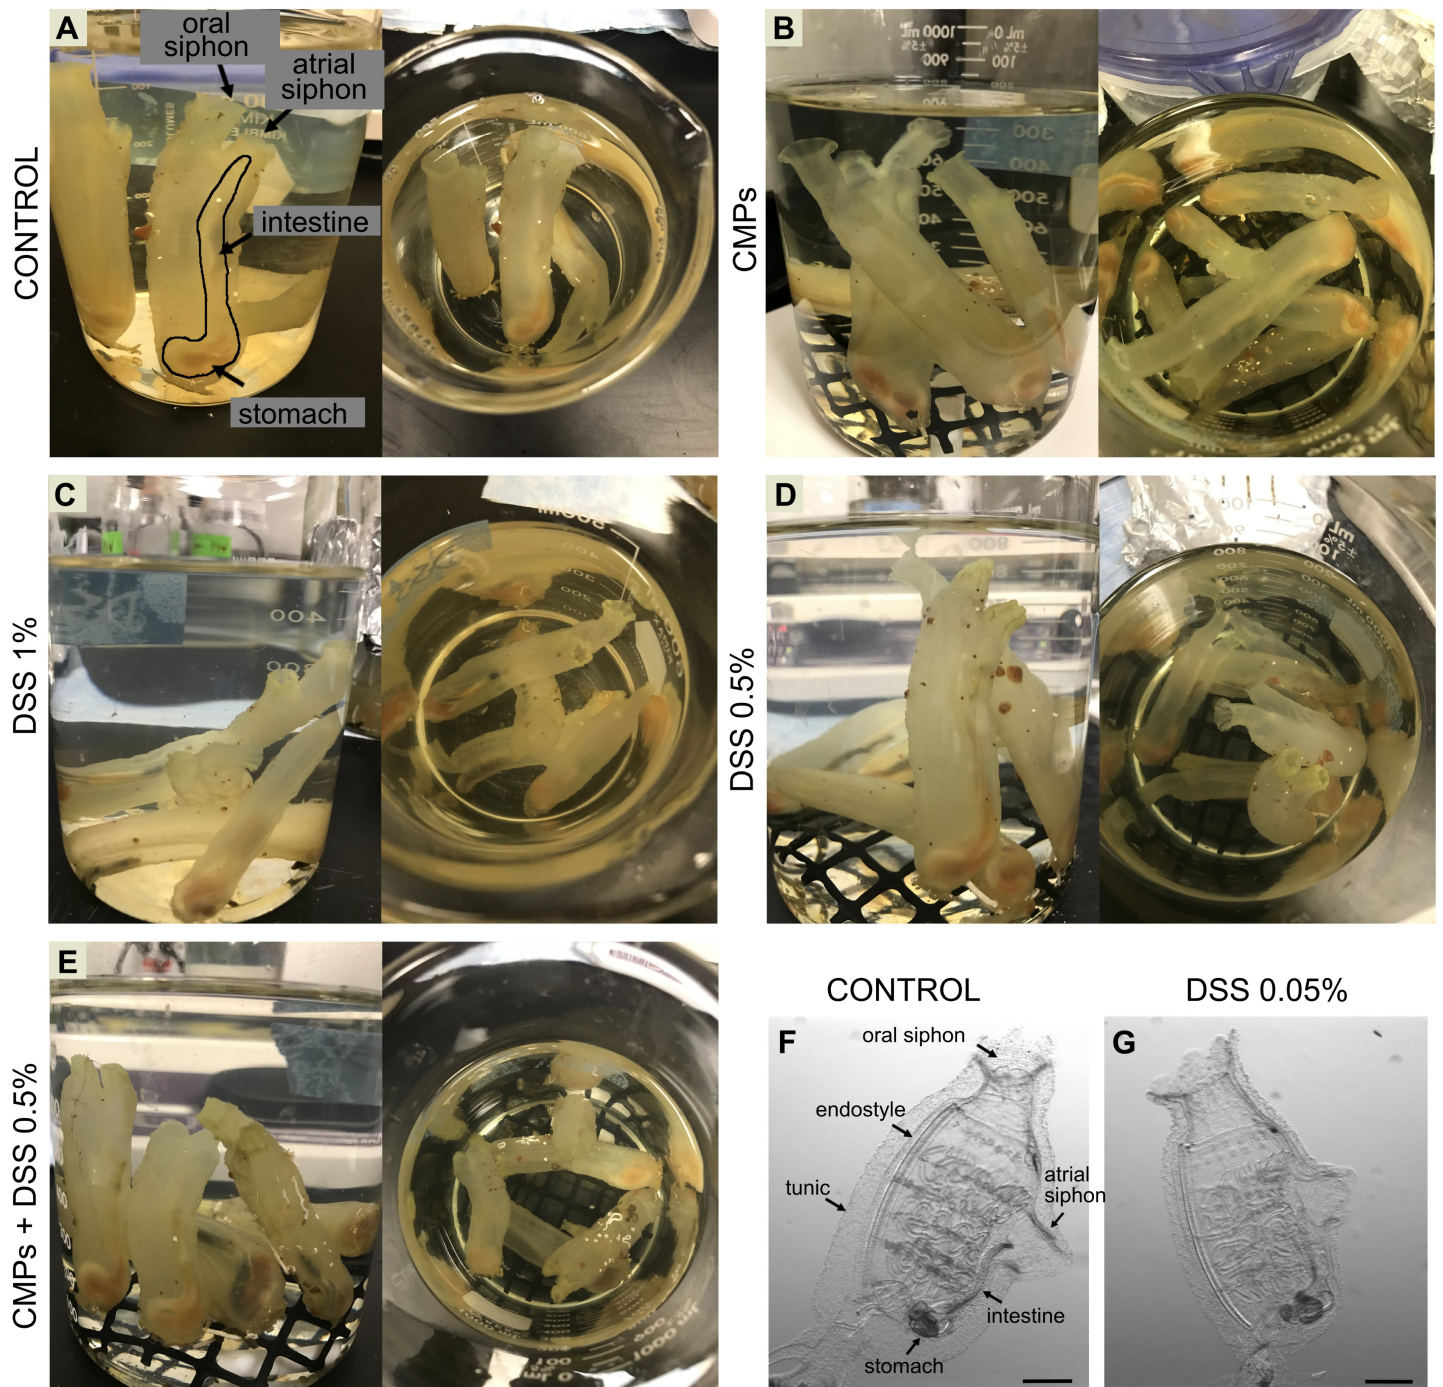

**Figure S1. *Ciona* juveniles and adults.** Whole mount images of *Ciona* adults after overnight treatment with the different experimental conditions. Control (A), CMPs (B), DSS 1% (C), DSS 0.5% (D), DSS 0.5% plus CMPs (E). Left image, side view; right image above view. Stage 7/8 of 1<sup>st</sup> ascidian juvenile control (F) and DSS 0.05% treated (G). n=30 animals observed for each condition. Scale bars 500  $\mu$ m.

## CONTROL

## DSS 0.5%

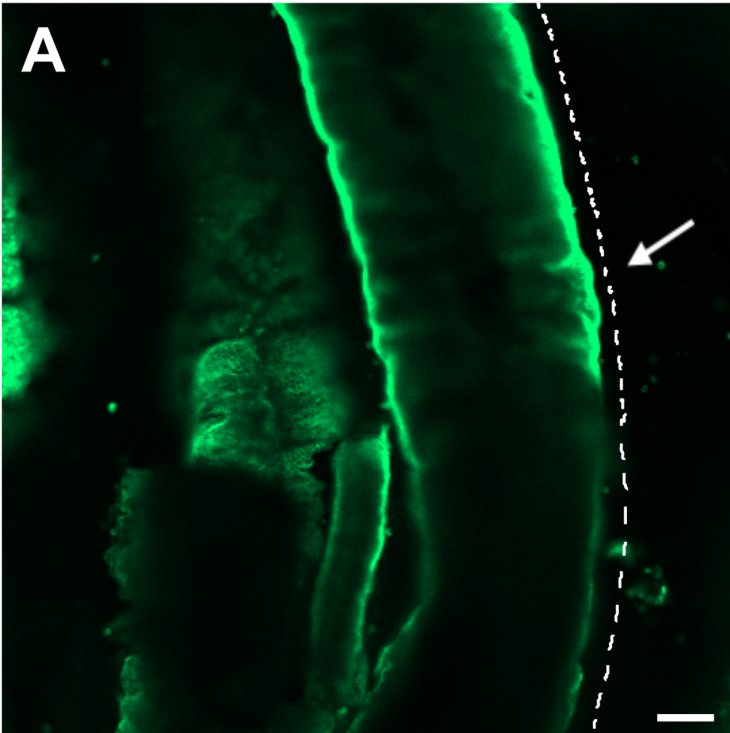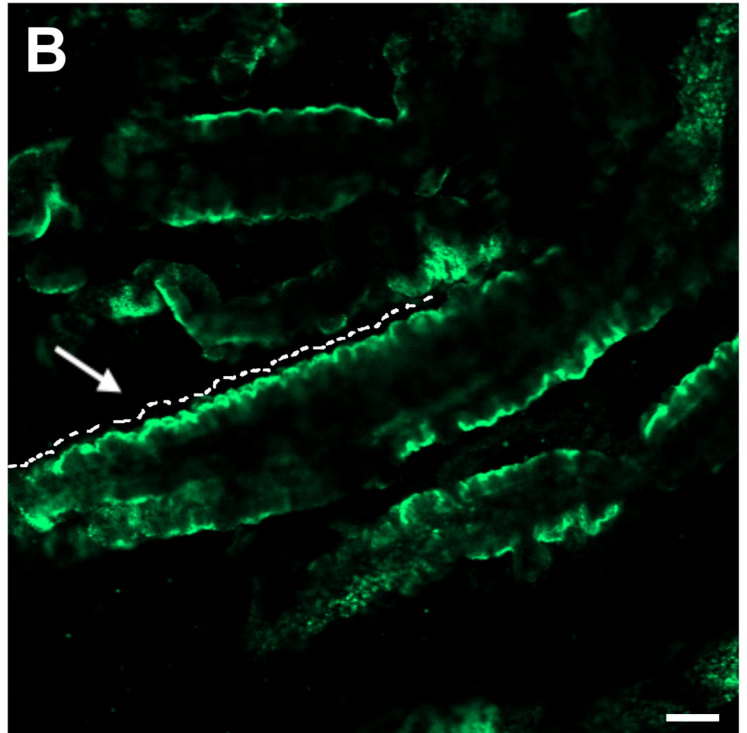

CMPs

CMPs + DSS 0.5%

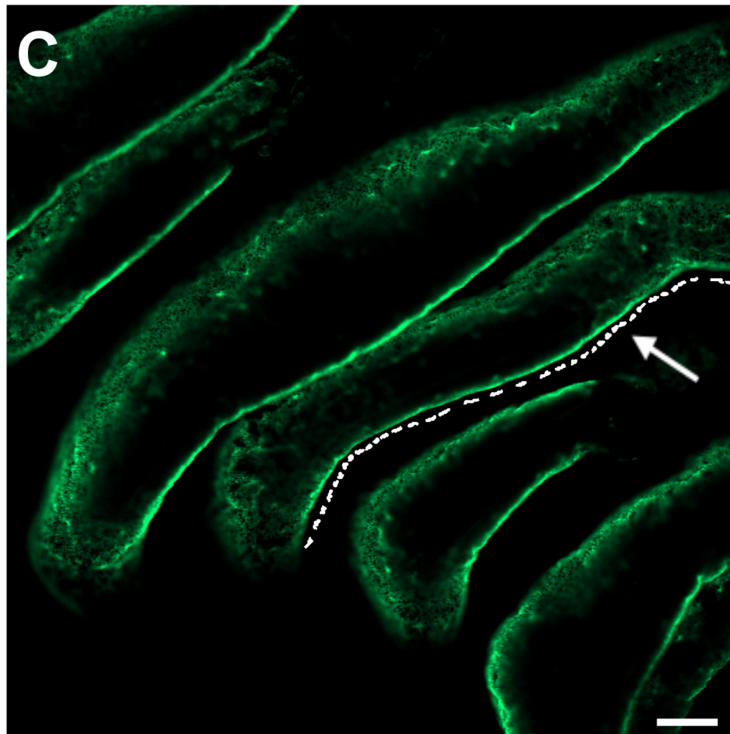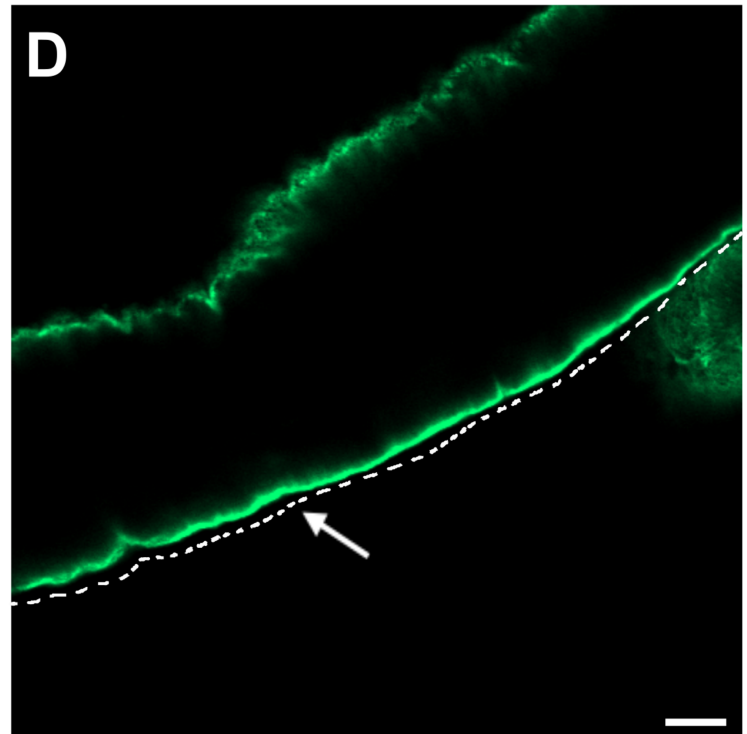

**Figure S2. CMPs effect on the stomach of adult DSS-treated animals.** Alexa Fluor 488 phalloidin staining reveals a smooth continuous stomach epithelium in control animals (A, arrow) and furrow-like structures in Control and (B) DSS-treated stomach epithelium (B, arrow). The presence of CMPs in the incubation medium did not affect the epithelial morphology (C D, arrow) and is comparable in to the controls, CMP-only treated animals (D C). White dashed lines highlight the morphology of the epithelium. n=6 animals observed for each condition. Scale bars (A, C D) 50 $\mu$ m and (B, D C) 100 $\mu$ m.
